# Supplementary material
Source: PubMed Central journal article supplement (PMC4988181)
Supplement: AEM.01344-16_zam018167360so1.pdf [file AEM.01344-16_zam018167360so1.pdf]

**TABLE S1** Identification of fungal strains by sequencing of ITS1-D2 rRNA gene region (rRNA) and partial sequences of actin (ACT) and translation elongation factor 1- $\alpha$  (TEF) genes. Reported % of identity was the highest match in BLAST search.

| Strain   | Highest Match                             | Identity % | Reference GenBank Accession numbers<br>rRNA, ACT, TEF | Deposited GenBank Accession numbers<br>rRNA, ACT, TEF |
|----------|-------------------------------------------|------------|-------------------------------------------------------|-------------------------------------------------------|
| T1.PL.1  | <i>Cladosporium pseudocladosporioides</i> | 100        | KJ596320.1                                            | KU605794                                              |
|          |                                           | 100        | HM148674.1                                            | KU605800                                              |
|          |                                           | 100        | HM148424.1                                            | KU605786                                              |
| A2.PP.5  | <i>Cladosporium tenuissimum</i>           | 100        | KJ596320.1                                            | KU605789                                              |
|          |                                           | 100        | HM148694.1                                            | KU605796                                              |
|          |                                           | 99         | HM148424.1                                            | KU605782                                              |
| BP8.I.3  | <i>Cladosporium asperulatum</i>           | 100        | AY251074.2                                            | KU605793                                              |
|          |                                           | 100        | KT600576.1                                            | KU605799                                              |
|          |                                           | 97         | LN834453.1                                            | KU605785                                              |
| A3.I.1   | <i>Cladosporium tenuissimum</i>           | 100        | AY251074.2                                            | KU605790                                              |
|          |                                           | 100        | HM148694.1                                            | KU605797                                              |
|          |                                           | 99         | HM148457.1                                            | KU605783                                              |
| BP3.I.2  | <i>Cladosporium asperulatum</i>           | 99         | AY251074.2                                            | KU605791                                              |
|          |                                           | 100        | KT600576.1                                            | KU605798                                              |
|          |                                           | 96         | LN834453.1                                            | KU605784                                              |
| A2.H.4   | <i>Cladosporium montecillanum</i>         | 100        | AY251074.2                                            | KU605787                                              |
|          |                                           | 100        | KT600604.1                                            | KU605795                                              |
|          |                                           | 96         | KT600504.1                                            | KU605781                                              |
| BP3.I.7* | <i>Penicillium chrysogenum</i>            | 100        | FJ613114.1                                            | KU605792                                              |
| A2.PL.1* | <i>Aspergillus fumigatus</i>              | 100        | FJ867935.1                                            | KU605788                                              |

\* Strains only identified by sequencing of ITS1-D2 rRNA gene region.

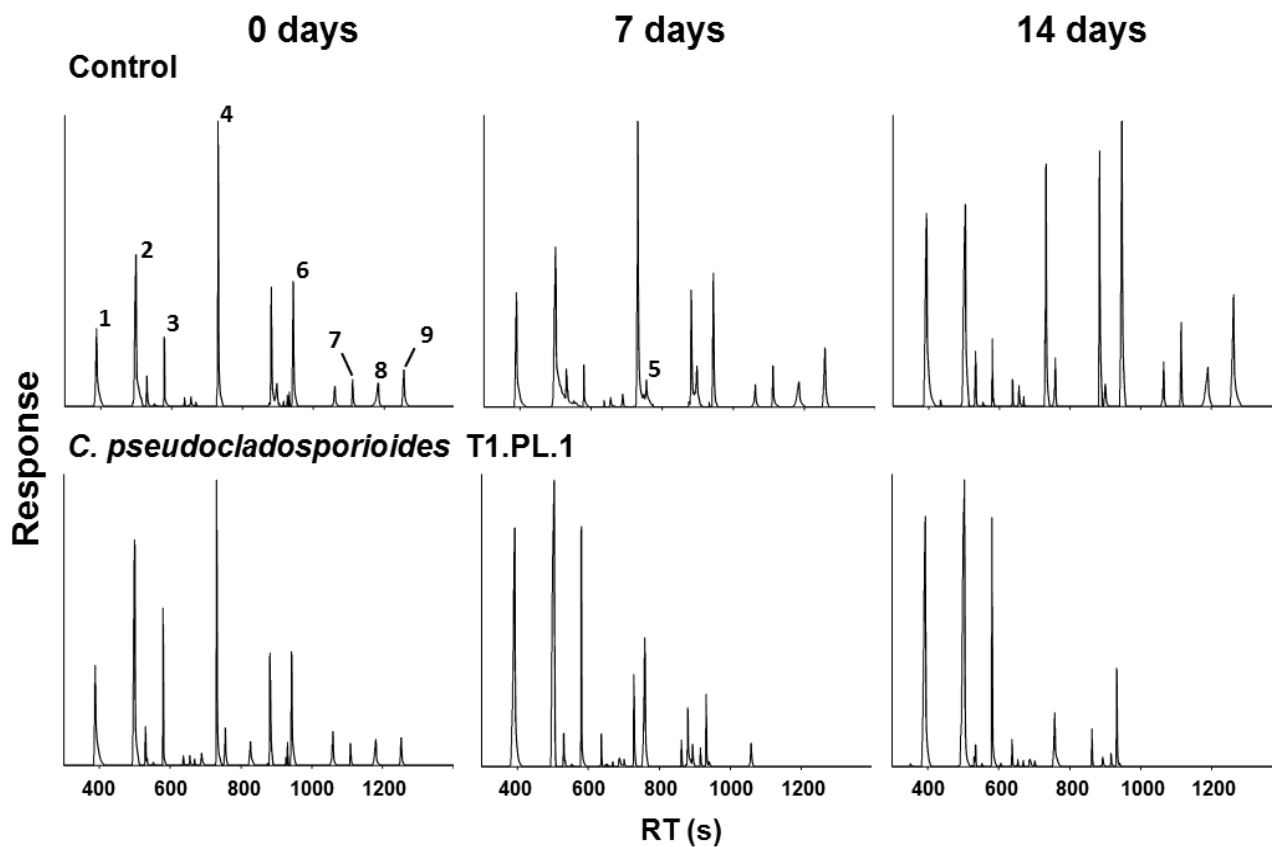

**FIG S1.** Gas chromatography analysis of compounds present in MM with Impranil after incubation with *Cladosporium pseudocladosporioides* strain T1.PL.1. Supernatants of non-inoculated and fungus-inoculated MM with Impranil cultures incubated at 25 °C for 0, 7, and 14 days were extracted with dichloromethane and analyzed by GC-MS. Numbers indicate representative peaks referred to tentatively identified compounds included in Table 1.

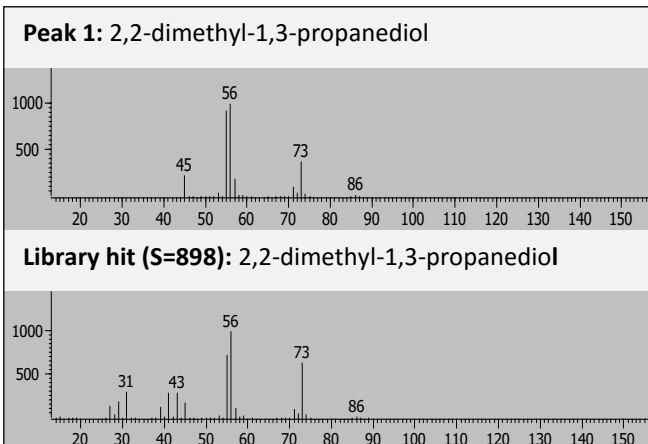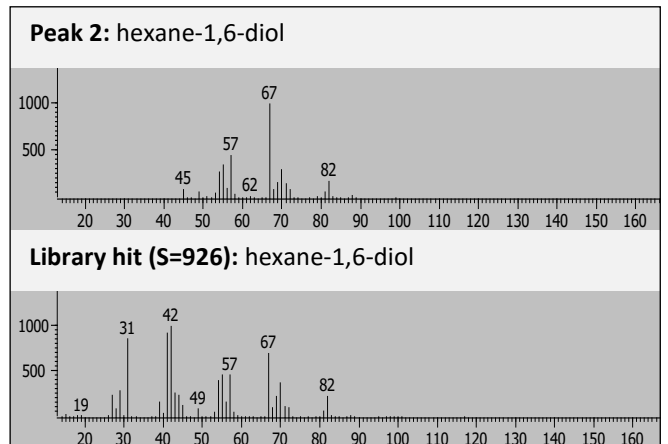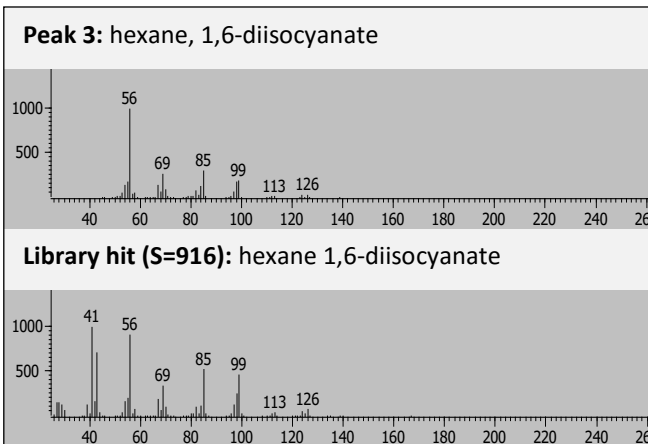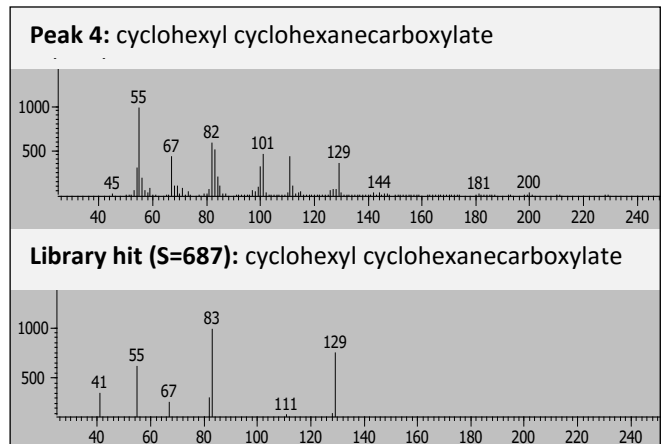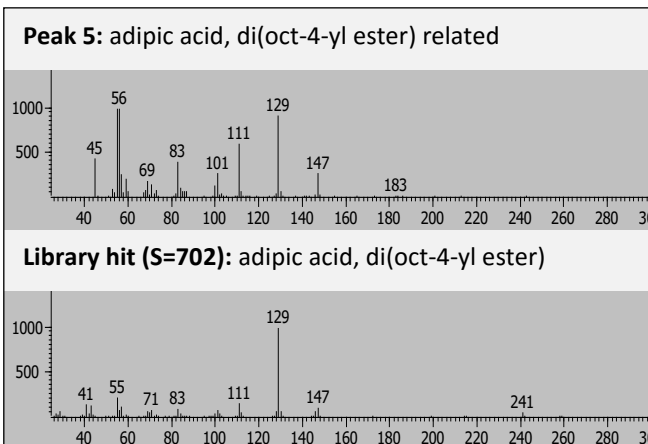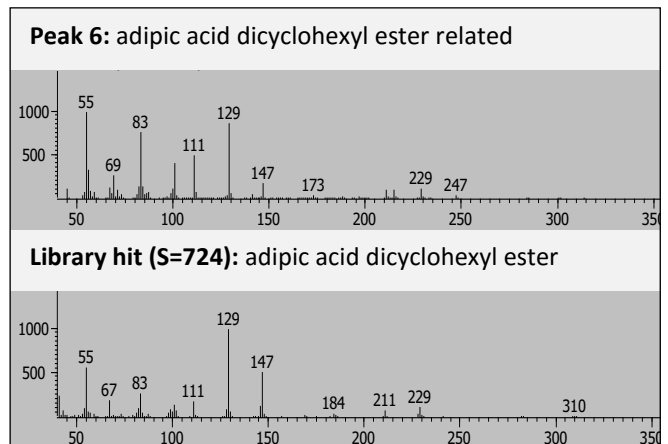

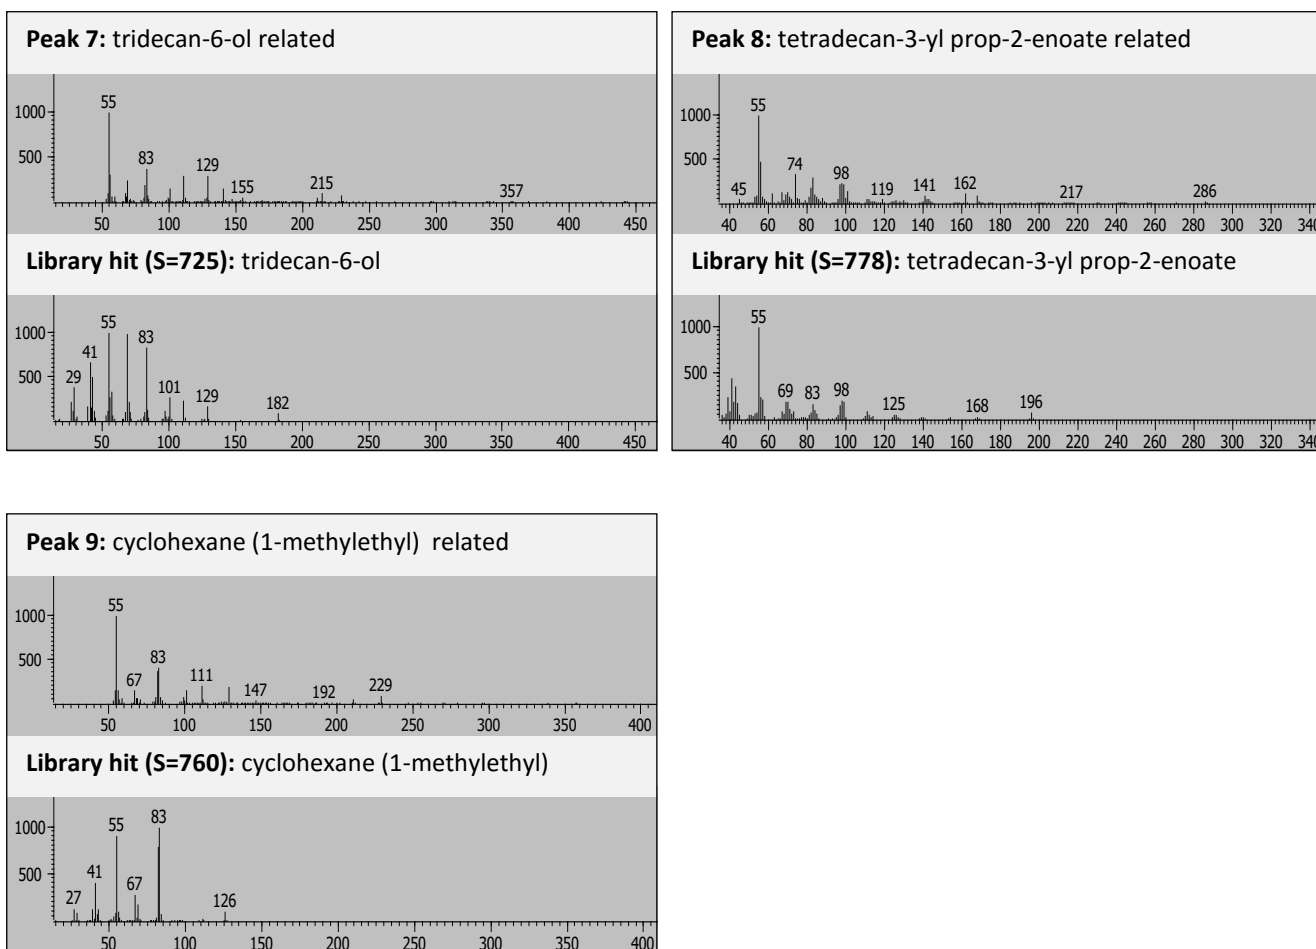

**FIG S2.** Mass spectra of compounds detected by GC-MS analysis of MM-Impranil supernatants incubated with *Cladosporium pseudocladosporioides* T1.PL.1. Each panel corresponds to a peak; upper image, mass spectrum of the compound detected in the sample; lower image, mass spectrum of the most similar compound from the NIST Mass Spec Data Center (2002 Library). S= similarity.
